# Supplementary material for: The ultrastructure of fibronectin fibers pulled from a protein monolayer at the air-liquid interface and the mechanism of the sheet-to-fiber transition
Source: PubMed Central journal article supplement — Biomaterials. 2015 Jan;36:66–79. doi: 10.1016/j.biomaterials.2014.08.012 (PMC4234482; doi:10.1016/j.biomaterials.2014.08.012), 2015-01
Supplement: mmc1.pdf [file mmc1.pdf]

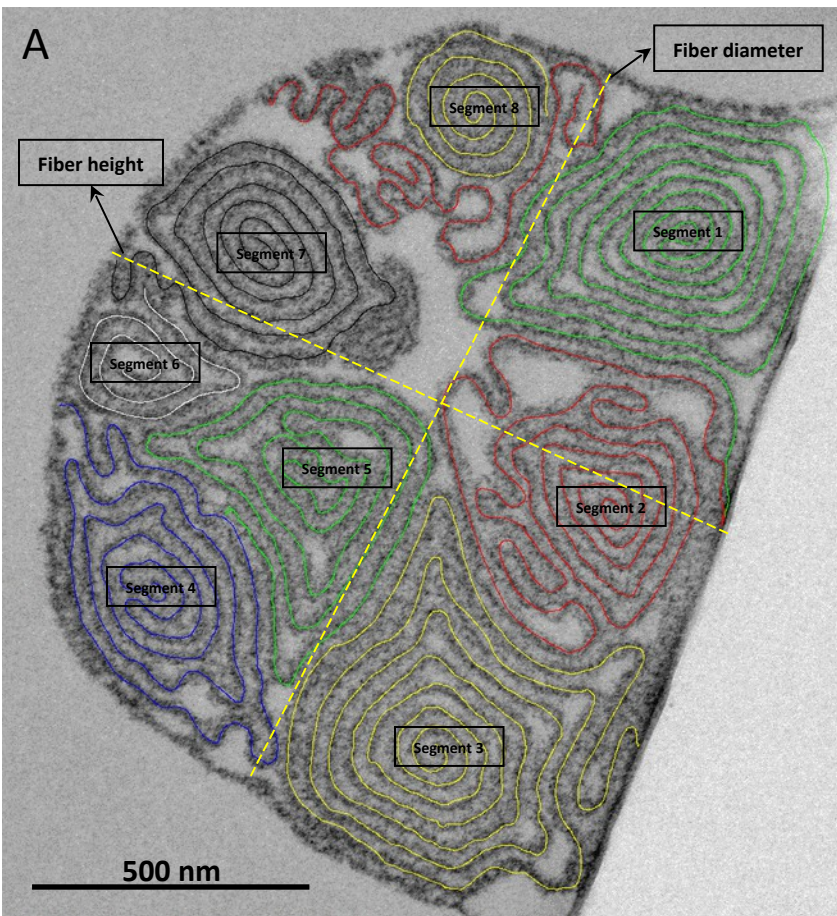

**B**

|                            | length (nm) |
|----------------------------|-------------|
| <i>segment 1</i>           | 16323       |
| <i>segment 2</i>           | 13217       |
| <i>segment 3</i>           | 16615       |
| <i>segment 4</i>           | 10053       |
| <i>segment 5</i>           | 9989        |
| <i>segment 6</i>           | 2953        |
| <i>segment 7</i>           | 9283        |
| <i>segment 8</i>           | 3949        |
| <i>sum</i>                 | 82383       |
| <hr/>                      |             |
| <i>fiber diameter</i>      | 1819        |
| <i>fiber height</i>        | 1520        |
| <i>fiber circumference</i> | 5088        |

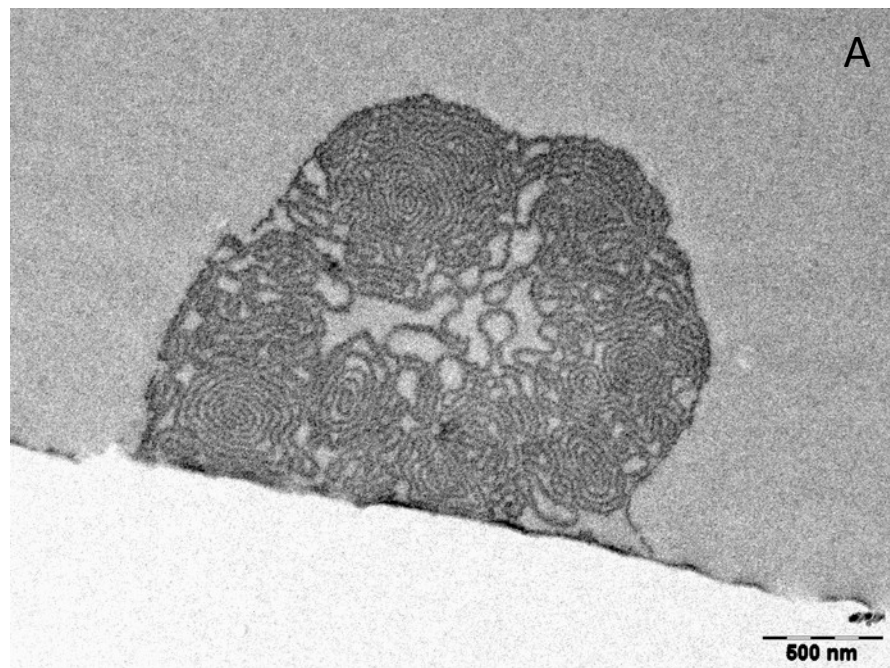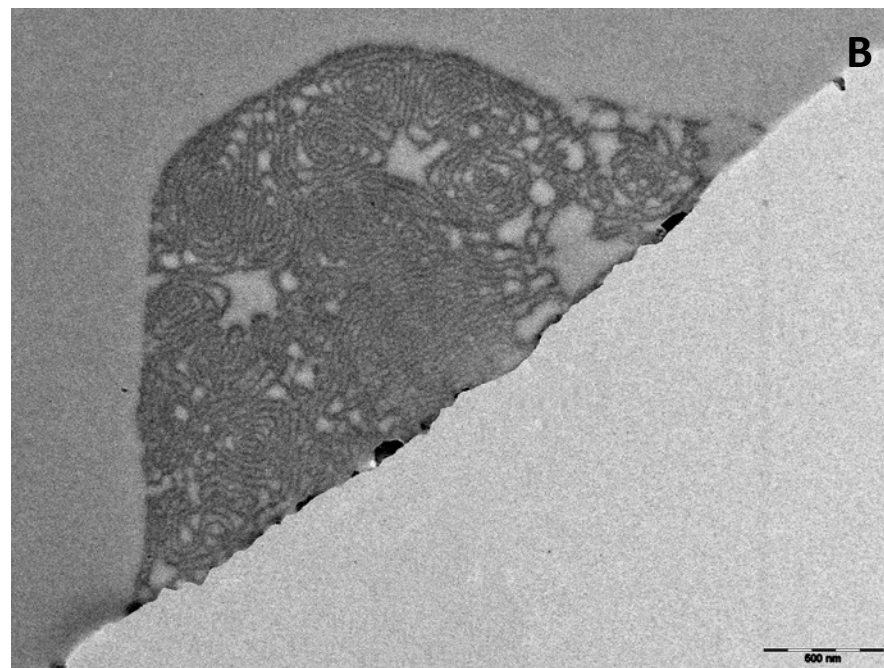

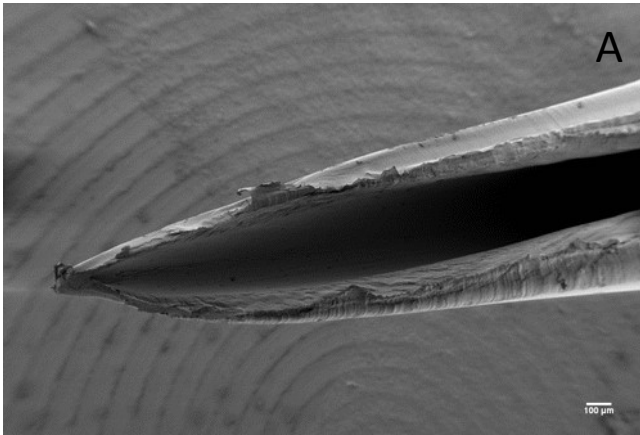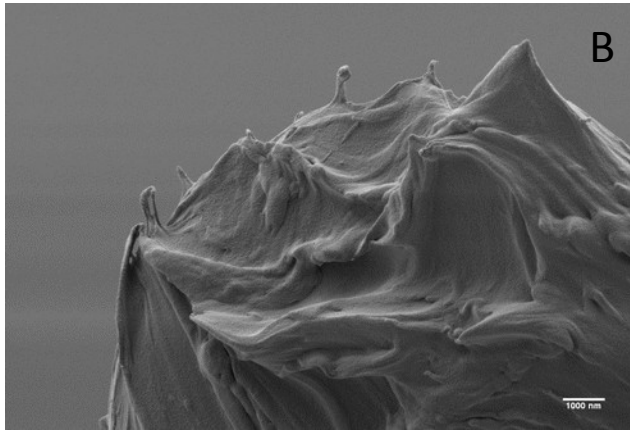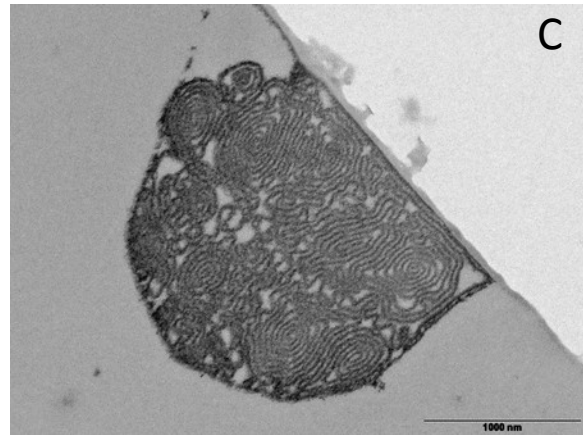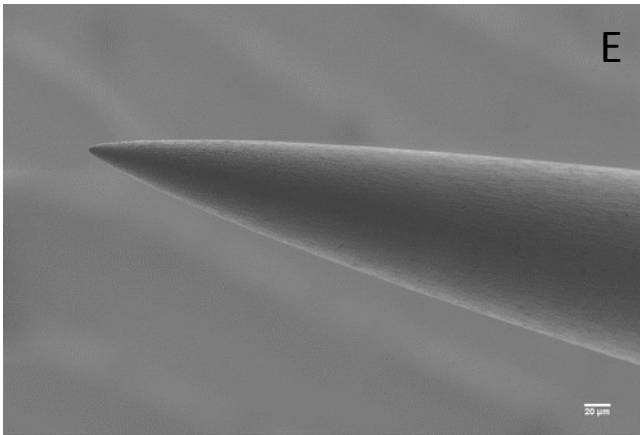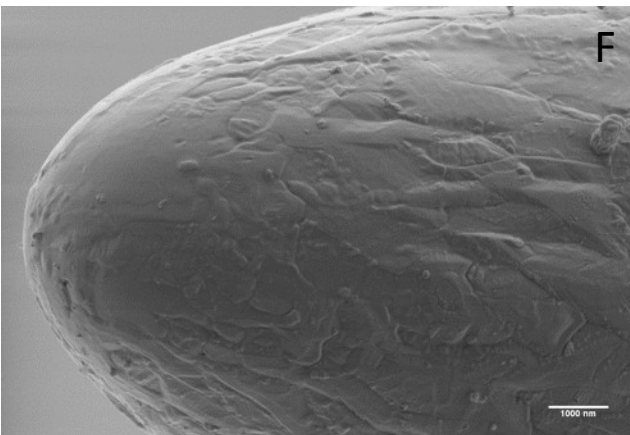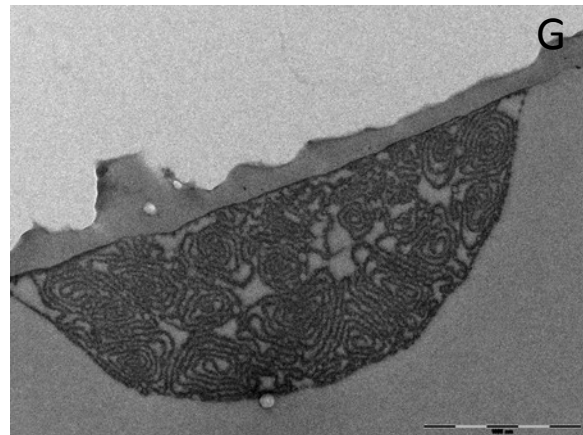

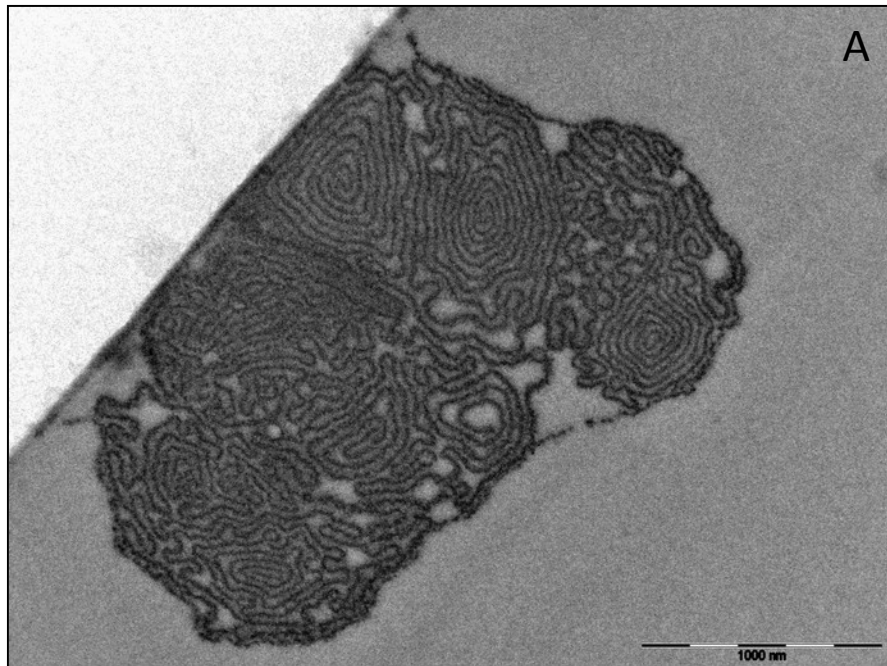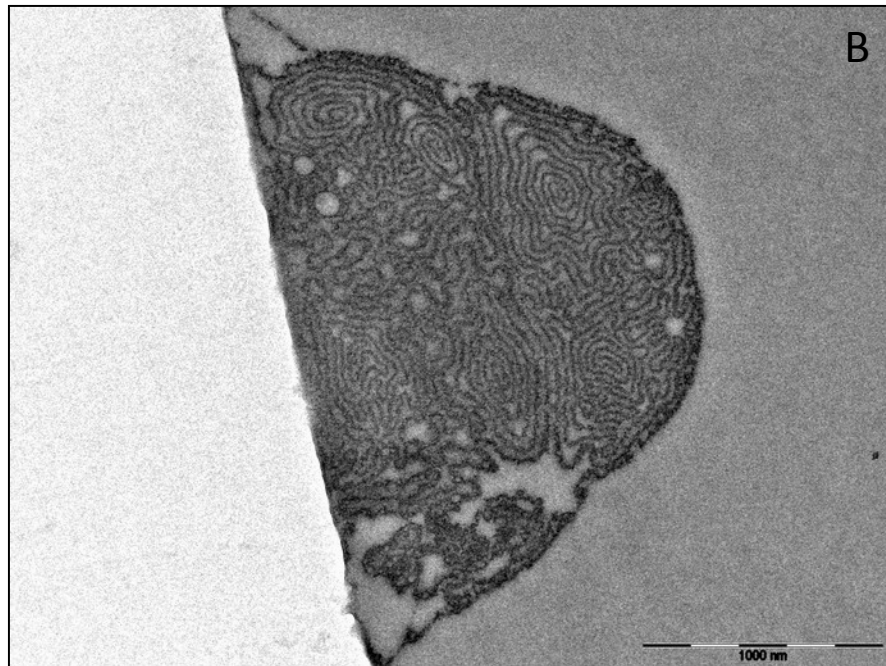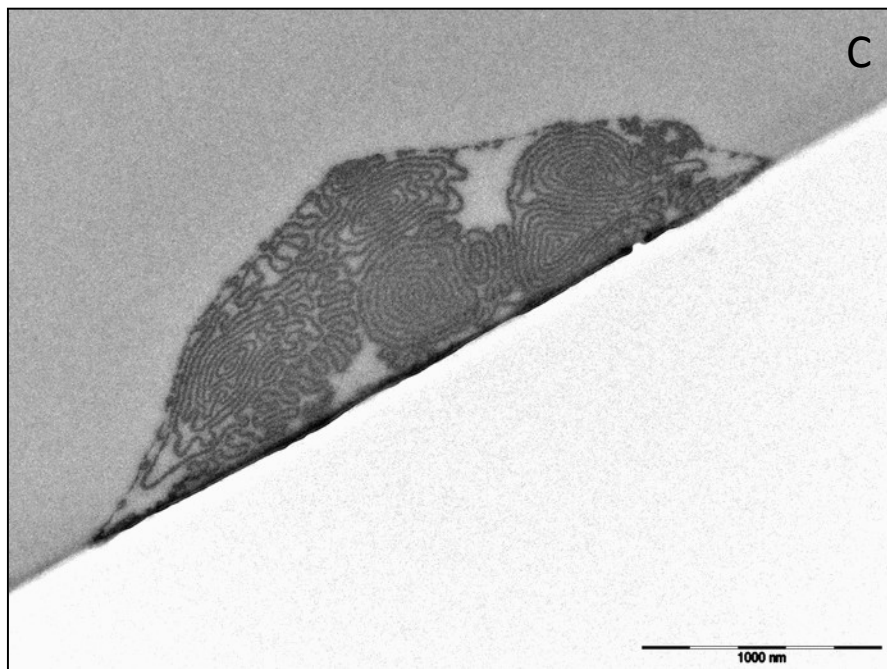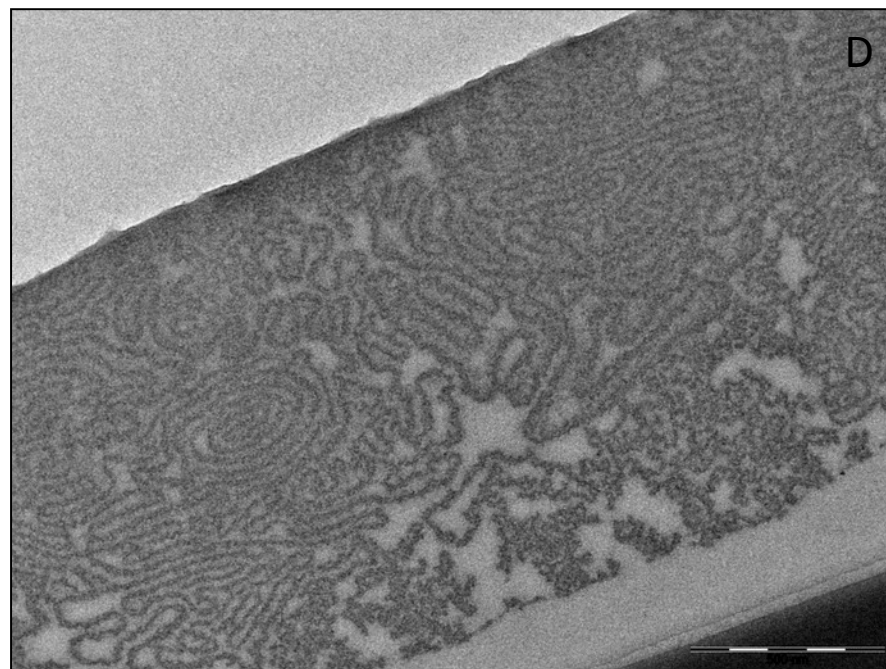

Suppl. Figure 4
